# Supplementary material for: Converging Evidence of Ubiquitous Male Bias in Human Sex Perception
Source: PLoS One. 2016 Feb 9;11(2):e0148623. doi: 10.1371/journal.pone.0148623 (PMC4747496; doi:10.1371/journal.pone.0148623)
Supplement: S1 Dataset — See Methods in main text. (XLSX) [file pone.0148623.s001.xlsx]

## Sheet: Observer age ANCOVA
	S1 Dataset. Preliminary analyses of observer age covariance. See Methods in main text.
	© Copyright 2015 Gaetano, van der Zwan, Oxner, Hayward, Doring, Blair, and Brooks.
						Analysis of Covariance Summary
						SS	df	MS	F	p	ηp2
	1000ms Presentation Duration	Own-Race Observers	Colour Images	Observer Age (Covariate)	Effect	0.047	1	0.047	0.077	0.783	0.002
					Error	21.596	35	0.617037
				Observer Race (Main Effect)	Effect	0.0102268	1	0.0102268	0.0165741	0.8983	0.00047332
					Error	21.5963	35	0.617037
				Observer Sex (Main Effect)	Effect	0.482966	1	0.482966	0.782719	0.382349	0.0218742
					Error	21.5963	35	0.617037
				Observer Race × Age (Interaction)	Effect	0.217217	1	0.217217	0.352033	0.55678	0.00995793
					Error	21.5963	35	0.617037
			Silhouette Images	Observer Age (Covariate)	Effect	0.706654	1	0.706654	0.922178	0.343491	0.0256715
					Error	26.8201	35	0.766289
				Observer Race (Main Effect)	Effect	1.28399	1	1.28399	1.6756	0.203986	0.0456869
					Error	26.8201	35	0.766289
				Observer Sex (Main Effect)	Effect	0.167993	1	0.167993	0.219229	0.642531	0.00622469
					Error	26.8201	35	0.766289
				Observer Race × Age (Interaction)	Effect	2.67149	1	2.67149	3.48627	0.0702738	0.0905847
					Error	26.8201	35	0.766289
		Other-Race Observers	Colour Images	Observer Age (Covariate)	Effect	0.27009	1	0.27009	0.479592	0.493177	0.0135174
					Error	19.7109	35	0.563168
				Observer Race (Main Effect)	Effect	0.0883846	1	0.0883846	0.156942	0.694393	0.00446404
					Error	19.7109	35	0.563168
				Observer Sex (Main Effect)	Effect	0.859008	1	0.859008	1.52532	0.225044	0.0417605
					Error	19.7109	35	0.563168
				Observer Race × Age (Interaction)	Effect	0.034499	1	0.034499	0.0612589	0.805963	0.0017472
					Error	19.7109	35	0.563168
			Silhouette Images	Observer Age (Covariate)	Effect	0.0651834	1	0.0651834	0.101098	0.752405	0.0028802
					Error	22.5664	35	0.644753
				Observer Race (Main Effect)	Effect	0.0729429	1	0.0729429	0.113133	0.738613	0.00322196
					Error	22.5664	35	0.644753
				Observer Sex (Main Effect)	Effect	0.0369557	1	0.0369557	0.0573176	0.812183	0.00163497
					Error	22.5664	35	0.644753
				Observer Race × Age (Interaction)	Effect	0.0228992	1	0.0228992	0.0355162	0.851607	0.00101372
					Error	22.5664	35	0.644753
	125ms Presentation Duration	Own-Race Observers	Colour Images	Observer Age (Covariate)	Effect	0.0792896	1	0.0792896	0.111993	0.740004	0.00338226
					Error	23.3635	33	0.707984
				Observer Race (Main Effect)	Effect	0.207696	1	0.207696	0.293362	0.591712	0.00881144
					Error	23.3635	33	0.707984
				Observer Sex (Main Effect)	Effect	0.00131986	1	0.00131986	0.00186425	0.965821	5.64891e-05
					Error	23.3635	33	0.707984
				Observer Race × Age (Interaction)	Effect	0.0417295	1	0.0417295	0.0589413	0.80968	0.00178292
					Error	23.3635	33	0.707984
			Silhouette Images	Observer Age (Covariate)	Effect	0.580442	1	0.580442	0.635361	0.431094	0.0188897
					Error	30.1475	33	0.913562
				Observer Race (Main Effect)	Effect	0.612281	1	0.612281	0.670214	0.41885	0.0199052
					Error	30.1475	33	0.913562
				Observer Sex (Main Effect)	Effect	0.00248833	1	0.00248833	0.00272376	0.958692	8.25315e-05
					Error	30.1475	33	0.913562
				Observer Race × Age (Interaction)	Effect	2.62729	1	2.62729	2.87588	0.0993321	0.0801619
					Error	30.1475	33	0.913562
		Other-Race Observers	Colour Images	Observer Age (Covariate)	Effect	0.430743	1	0.430743	0.38164	0.540726	0.0107864
					Error	39.5032	35	1.12866
				Observer Race (Main Effect)	Effect	0.639917	1	0.639917	0.566968	0.456501	0.0159409
					Error	39.5032	35	1.12866
				Observer Sex (Main Effect)	Effect	0.0985609	1	0.0985609	0.0873253	0.769352	0.0024888
					Error	39.5032	35	1.12866
				Observer Race × Age (Interaction)	Effect	0.00363724	1	0.00363724	0.0032226	0.955053	9.20659e-05
					Error	39.5032	35	1.12866
			Silhouette Images	Observer Age (Covariate)	Effect	0.0318332	1	0.0318332	0.0387543	0.845075	0.00110604
					Error	28.7494	35	0.821411
				Observer Race (Main Effect)	Effect	1.17246	1	1.17246	1.42737	0.240227	0.0391841
					Error	28.7494	35	0.821411
				Observer Sex (Main Effect)	Effect	0.345059	1	0.345059	0.420081	0.521126	0.01186
					Error	28.7494	35	0.821411
				Observer Race × Age (Interaction)	Effect	0.800499	1	0.800499	0.974542	0.330326	0.0270898
					Error	28.7494	35	0.821411
